# Supplementary material for: Predissociation spectra of the 35Cl−(H2) complex and its isotopologue 35Cl−(D2)
Source: Royal Society of Chemistry journal article supplement (doi:10.1039/d0cp05015f), 2020-01-01
Supplement: d0cp05015f1.pdf [file d0cp05015f1.pdf]

# Supplementary material for “Vibrational predissociation spectra of the $^{35}\text{Cl}^-(\text{H}_2)$ complex and its isotopologue $^{35}\text{Cl}^-(\text{D}_2)$ ”

Miguel Lara-Moreno , Philippe Halvick, and Thierry Stoecklin

Université de Bordeaux, ISM, CNRS UMR 5255, 33405, Talence, France

October 23, 2020

Table S1: Variation of the  $A_1$  rovibrational energy levels for  $J = 0$  with respect to the number of point in the DVR grid  $R \in [3, 30]$  and the number of vibrational and rotational levels of the diatom included in the calculations.

| Species                   | $(v, j, k)$                                 |          |          |          |          |          |          |           |           |           |           |
|---------------------------|---------------------------------------------|----------|----------|----------|----------|----------|----------|-----------|-----------|-----------|-----------|
|                           | (1,4,50)                                    | (1,5,50) | (1,6,50) | (1,7,50) | (2,6,50) | (3,6,50) | (4,6,50) | (3,6,100) | (3,6,150) | (3,6,200) | (3,6,250) |
| $\text{Cl}^-(\text{H}_2)$ | Rovibrational energies ( $\text{cm}^{-1}$ ) |          |          |          |          |          |          |           |           |           |           |
|                           | -404.911                                    | -404.915 | -404.915 | -404.915 | -411.579 | -411.591 | -411.591 | -416.547  | -416.544  | -416.544  | -416.544  |
|                           | -257.401                                    | -257.413 | -257.413 | -257.413 | -267.275 | -267.322 | -267.322 | -274.763  | -274.754  | -274.754  | -274.754  |
|                           | -194.898                                    | -194.911 | -194.911 | -194.911 | -202.959 | -202.987 | -202.987 | -167.388  | -167.384  | -167.384  | -167.384  |
|                           | -110.065                                    | -110.066 | -110.066 | -110.066 | -111.076 | -111.079 | -111.079 | -91.605   | -91.617   | -91.617   | -91.617   |
|                           | -48.292                                     | -48.292  | -48.292  | -48.292  | -48.573  | -48.574  | -48.574  | -43.250   | -43.271   | -43.271   | -43.271   |
|                           | -17.393                                     | -17.393  | -17.393  | -17.393  | -17.489  | -17.489  | -17.489  | -16.576   | -16.592   | -16.592   | -16.592   |
|                           | -4.717                                      | -4.717   | -4.717   | -4.717   | -4.748   | -4.748   | -4.748   | -4.677    | -4.684    | -4.684    | -4.684    |
| $\text{Cl}^-(\text{D}_2)$ | -0.724                                      | -0.724   | -0.724   | -0.724   | -0.731   | -0.732   | -0.732   | -0.736    | -0.737    | -0.737    | -0.737    |
|                           |                                             |          |          |          |          |          |          | -0.001    | -0.002    | -0.002    | -0.002    |
|                           | -503.626                                    | -503.676 | -503.676 | -503.676 | -511.053 | -511.070 | -511.070 | -521.711  | -521.704  | -521.704  | -521.704  |
|                           | -388.492                                    | -388.736 | -388.741 | -388.741 | -406.489 | -406.610 | -406.611 | -401.982  | -401.759  | -401.759  | -401.759  |
|                           | -317.557                                    | -317.574 | -317.574 | -317.574 | -320.245 | -320.250 | -320.250 | -299.995  | -299.431  | -299.431  | -299.431  |
|                           | -181.291                                    | -181.292 | -181.292 | -181.292 | -182.034 | -182.035 | -182.035 | -214.246  | -214.310  | -214.310  | -214.310  |
|                           | -95.129                                     | -95.129  | -95.129  | -95.129  | -95.399  | -95.400  | -95.400  | -144.288  | -145.840  | -145.839  | -145.839  |
|                           | -74.806                                     | -75.025  | -75.027  | -75.027  | -76.538  | -76.539  | -76.539  | -90.754   | -93.172   | -93.171   | -93.171   |
|                           | -46.694                                     | -46.695  | -46.695  | -46.695  | -46.802  | -46.802  | -46.802  | -74.073   | -74.073   | -74.073   | -74.073   |
|                           | -21.061                                     | -21.062  | -21.062  | -21.062  | -21.113  | -21.113  | -21.113  | -52.870   | -54.973   | -54.972   | -54.972   |
|                           | -13.306                                     | -13.439  | -13.441  | -13.441  | -14.390  | -14.391  | -14.391  | -28.080   | -29.302   | -29.302   | -29.302   |
|                           | -8.348                                      | -8.349   | -8.349   | -8.349   | -8.371   | -8.371   | -8.371   | -13.199   | -13.700   | -13.700   | -13.700   |
|                           | -2.753                                      | -2.753   | -2.753   | -2.753   | -2.760   | -2.760   | -2.760   | -7.066    | -7.066    | -7.066    | -7.066    |
|                           | -0.606                                      | -0.606   | -0.606   | -0.606   | -0.608   | -0.608   | -0.608   | -5.246    | -5.404    | -5.403    | -5.403    |
| -0.073                    | -0.073                                      | -0.073   | -0.073   | -0.074   | -0.074   | -0.074   | -1.582   | -1.625    | -1.625    | -1.625    |           |
|                           |                                             |          |          |          |          |          | -0.283   | -0.291    | -0.291    | -0.291    |           |

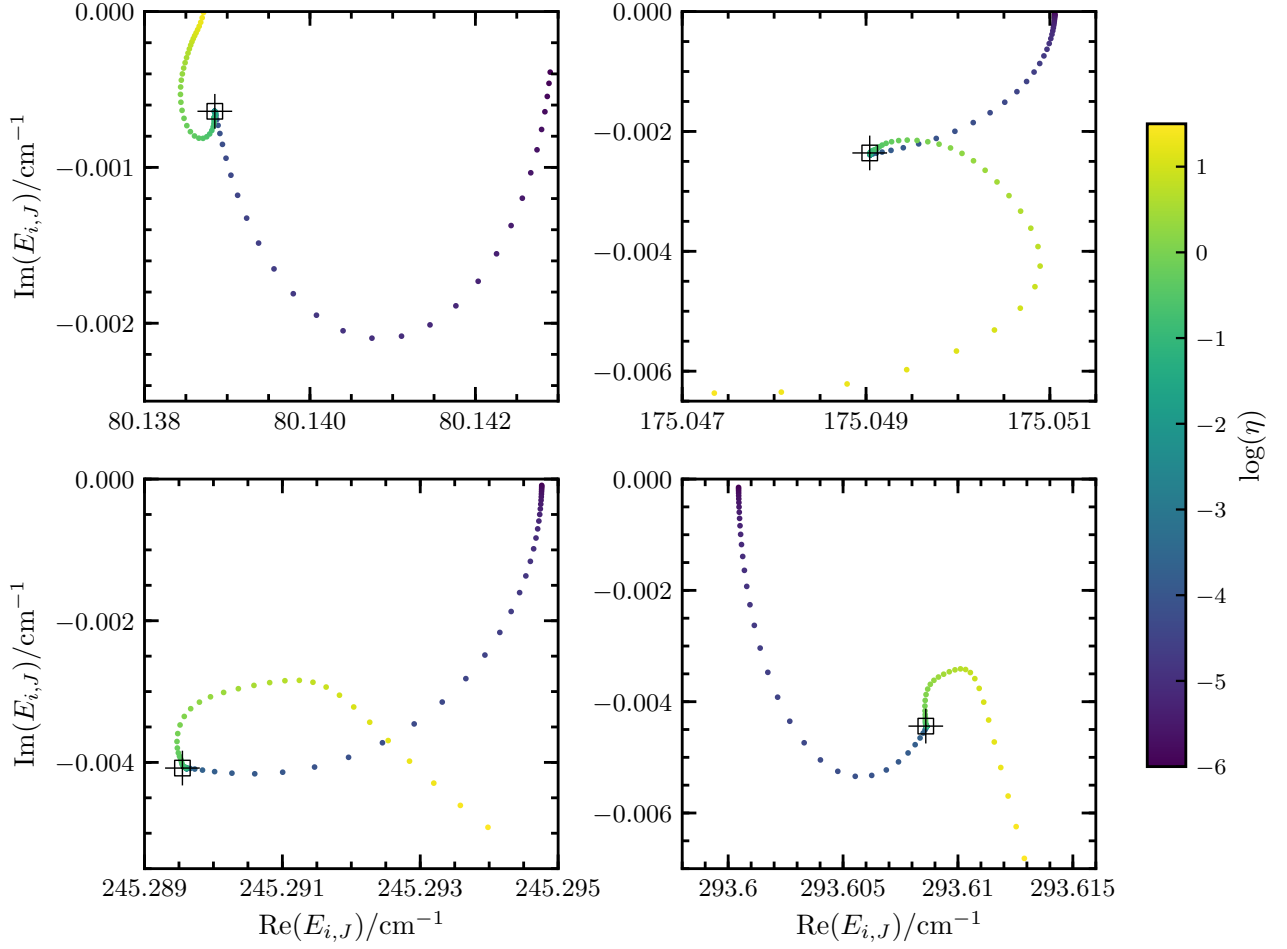

Figure S1:  $\eta$ -trajectories for the low lying resonant states of  $\text{Cl}^-(\text{H}_2)$  for  $J = 0$  and symmetry  $A_1$ . The values of  $\eta$  grows exponentially according to  $\log(\eta_k) = \log(\eta_{\min}) + \frac{k-1}{N} \log(\frac{\eta_{\max}}{\eta_{\min}})$  with  $\eta_{\min} = 10^{-6}$ ,  $\eta_{\max} = 31.62$  and the number of steps  $N = 100$

Table S2: Lowest energy levels of  $\text{Cl}^-(\text{H}_2)$  for  $J = 0$  with their assigned vibrational quantum numbers  $v_1, v_2, l_2$  whenever possible, parity  $p$ , representation  $\Gamma_{rovib}$  of the group  $G_4$ . Energies are given in  $\text{cm}^{-1}$  with respect to the energy of separated monomers  $\text{Cl}^-$  and *para*- $\text{H}_2$ . For each set of quantum numbers  $(v_1, v_2, l_2, p)$ , we give the energies of the *para* and *ortho* states whenever possible.  $\Delta E$  is the energy splitting due to tunneling.

| $v_1$ | $v_2$ | $l_2$ | $p$ | Energy   | $\Gamma_{rovib}$ | $\Delta E$ | $v_1$ | $v_2$ | $l_2$ | $p$ | Energy  | $\Gamma_{rovib}$ | $\Delta E$ |
|-------|-------|-------|-----|----------|------------------|------------|-------|-------|-------|-----|---------|------------------|------------|
| 0     | 0     | 0     | +   | -416.544 | $A_1$            | 8.890      | 7     | 0     | 0     | +   | -0.737  | $A_1$            | 105.986    |
|       |       |       |     | -407.655 | $B_2$            |            |       |       |       |     | 105.249 | $B_2$            |            |
| 1     | 0     | 0     | +   | -274.754 | $A_1$            | 17.728     | 8     | 0     | 0     | +   | -0.002  | $A_1$            | 113.105    |
|       |       |       |     | -257.026 | $B_2$            |            |       |       |       |     | 113.103 | $B_2$            |            |
| 2     | 0     | 0     | +   | -167.384 | $A_1$            | 29.932     | 9     | 0     | 0     | +   | 116.699 | $B_2$            |            |
|       |       |       |     | -137.451 | $B_2$            |            |       |       |       |     | 117.965 | $B_2$            |            |
| 3     | 0     | 0     | +   | -91.617  | $A_1$            | 45.057     | 0     | 2     | 0     | +   | 80.143  | $A_1$            | 278.809    |
|       |       |       |     | -46.560  | $B_2$            |            |       |       |       |     | 358.952 | $B_2$            |            |
| 4     | 0     | 0     | +   | -43.271  | $A_1$            | 62.073     | 1     | 2     | 0     | +   | 175.051 | $A_1$            | 299.037    |
|       |       |       |     | 18.802   | $B_2$            |            |       |       |       |     | 474.088 | $B_2$            |            |
| 5     | 0     | 0     | +   | -16.592  | $A_1$            | 79.303     | 2     | 2     | 0     | +   | 245.295 | $A_1$            | 315.715    |
|       |       |       |     | 62.711   | $B_2$            |            |       |       |       |     | 561.009 | $B_2$            |            |
| 6     | 0     | 0     | +   | -4.684   | $A_1$            | 94.605     | 3     | 2     | 0     | +   | 293.600 | $A_1$            | 328.931    |
|       |       |       |     | 89.921   | $B_2$            |            |       |       |       |     | 622.531 | $B_2$            |            |

Table S3: Lowest energy levels of  $\text{Cl}^-(\text{D}_2)$  for  $J = 0$  with their assigned vibrational quantum numbers  $v_1, v_2, l_2$  whenever possible, parity  $p$ , representation  $\Gamma_{rovib}$  of the group  $\text{G}_4$ . Energies are given in  $\text{cm}^{-1}$  with respect to the energy of separated monomers  $\text{Cl}^-$  and *ortho*- $\text{D}_2$ . For each set of quantum numbers  $(v_1, v_2, l_2, p)$ , we give the energies of the *para* and *ortho* states.  $\Delta E$  is the energy splitting due to tunneling.

| $v_1$ | $v_2$ | $l_2$ | $p$ | Energy   | $\Gamma_{rovib}$ | $\Delta E$ | $v_1$ | $v_2$ | $l_2$ | $p$ | Energy  | $\Gamma_{rovib}$ | $\Delta E$ |
|-------|-------|-------|-----|----------|------------------|------------|-------|-------|-------|-----|---------|------------------|------------|
| 0     | 0     | 0     | +   | -521.704 | $A_1$            | 0.394      | 11    | 0     | 0     | +   | -0.291  | $A_1$            | 52.894     |
|       |       |       |     | -521.310 | $B_2$            |            |       |       |       |     | 52.603  | $B_2$            |            |
| 1     | 0     | 0     | +   | -401.759 | $A_1$            | 1.024      | 0     | 2     | 0     | +   | -74.073 | $A_1$            | 76.724     |
|       |       |       |     | -400.736 | $B_2$            |            |       |       |       |     | 2.651   | $B_2$            |            |
| 2     | 0     | 0     | +   | -299.431 | $A_1$            | 2.207      | 1     | 2     | 0     | +   | -7.066  | $A_1$            | 97.538     |
|       |       |       |     | -297.224 | $B_2$            |            |       |       |       |     | 90.472  | $B_2$            |            |
| 3     | 0     | 0     | +   | -214.310 | $A_1$            | 4.242      | 2     | 2     | 0     | +   | 46.762  | $A_1$            | 116.145    |
|       |       |       |     | -210.068 | $B_2$            |            |       |       |       |     | 162.908 | $B_2$            |            |
| 4     | 0     | 0     | +   | -145.839 | $A_1$            | 7.457      | 3     | 2     | 0     | +   | 88.708  | $A_1$            | 132.219    |
|       |       |       |     | -138.382 | $B_2$            |            |       |       |       |     | 220.927 | $B_2$            |            |
| 5     | 0     | 0     | +   | -93.171  | $A_1$            | 12.117     | 4     | 2     | 0     | +   | 120.176 | $A_1$            | 145.566    |
|       |       |       |     | -81.054  | $B_2$            |            |       |       |       |     | 265.743 | $B_2$            |            |
| 6     | 0     | 0     | +   | -54.972  | $A_1$            | 18.275     | 5     | 2     | 0     | +   | 142.723 | $A_1$            | 156.155    |
|       |       |       |     | -36.697  | $B_2$            |            |       |       |       |     | 298.878 | $B_2$            |            |
| 7     | 0     | 0     | +   | -29.302  | $A_1$            | 25.658     | 0     | 4     | 0     | +   | 262.554 | $A_1$            | 274.567    |
|       |       |       |     | -3.644   | $B_2$            |            |       |       |       |     | 537.121 | $B_2$            |            |
| 8     | 0     | 0     | +   | -13.700  | $A_1$            | 33.656     | 1     | 4     | 0     | +   | 347.864 | $A_1$            | 277.082    |
|       |       |       |     | 19.956   | $B_2$            |            |       |       |       |     | 624.946 | $B_2$            |            |
| 9     | 0     | 0     | +   | -5.403   | $A_1$            | 41.385     | 2     | 4     | 0     | +   | 417.217 | $A_1$            | 280.081    |
|       |       |       |     | 35.981   | $B_2$            |            |       |       |       |     | 697.298 | $B_2$            |            |
| 10    | 0     | 0     | +   | -1.625   | $A_1$            | 47.906     | 3     | 4     | 0     | +   | 472.248 | $A_1$            | 282.855    |
|       |       |       |     | 46.281   | $B_2$            |            |       |       |       |     | 755.103 | $B_2$            |            |

Table S4: Lowest energy levels of  $\text{Cl}^-(\text{H}_2)$  for  $J = 1$  with their assigned vibrational quantum numbers  $v_1, v_2, l_2$  whenever possible, parity  $p$ , representation  $\Gamma_{rovib}$  of the group  $G_4$ . Energies are given in  $\text{cm}^{-1}$  with respect to the energy of separated monomers  $\text{Cl}^-$  and *para*- $\text{H}_2$ .  $\Delta E$  is the energy splitting due to tunneling.

| $v_1$ | $v_2$ | $l_2$ | $p$ | Energy   | $\Gamma_{rovib}$ | $\Delta E$ | $v_1$ | $v_2$ | $l_2$ | $p$ | Energy  | $\Gamma_{rovib}$ | $\Delta E$ |
|-------|-------|-------|-----|----------|------------------|------------|-------|-------|-------|-----|---------|------------------|------------|
| 0     | 0     | 0     | -   | -414.871 | $A_2$            | 8.899      | 2     | 1     | -1    | -   | 69.379  | $B_1$            | 145.339    |
|       |       |       |     | -405.972 | $B_1$            |            |       |       |       |     |         | 214.718          |            |
| 1     | 0     | 0     | -   | -273.282 | $A_2$            | 17.754     | 2     | 1     | 1     | +   | 69.367  | $B_2$            | 145.432    |
|       |       |       |     | -255.527 | $B_1$            |            |       |       |       |     |         | 214.799          |            |
| 2     | 0     | 0     | -   | -166.130 | $A_2$            | 29.984     | 3     | 1     | -1    | -   | 102.909 | $B_1$            | 174.266    |
|       |       |       |     | -136.146 | $B_1$            |            |       |       |       |     |         | 277.174          |            |
| 3     | 0     | 0     | -   | -90.599  | $A_2$            | 45.144     | 3     | 1     | 1     | +   | 102.898 | $B_2$            | 174.351    |
|       |       |       |     | -45.455  | $B_1$            |            |       |       |       |     |         | 277.249          |            |
| 4     | 0     | 0     | -   | -42.500  | $A_2$            | 62.202     | 4     | 1     | -1    | -   | 116.501 | $B_1$            | 200.261    |
|       |       |       |     | 19.702   | $B_1$            |            |       |       |       |     |         | 316.762          |            |
| 5     | 0     | 0     | -   | -16.068  | $A_2$            | 79.478     | 4     | 1     | 1     | +   | 116.493 | $B_2$            | 200.348    |
|       |       |       |     | 63.410   | $B_1$            |            |       |       |       |     |         | 316.841          |            |
| 6     | 0     | 0     | -   | -4.383   | $A_2$            | 94.814     | 0     | 2     | 0     | -   | 81.632  | $A_2$            | 278.323    |
|       |       |       |     | 90.432   | $B_1$            |            |       |       |       |     |         | 359.955          |            |
| 7     | 0     | 0     | -   | -0.609   | $A_2$            | 106.204    | 1     | 2     | 0     | -   | 176.333 | $A_2$            | 298.600    |
|       |       |       |     | 105.595  | $B_1$            |            |       |       |       |     |         | 474.932          |            |
| 0     | 1     | -1    | -   | -79.796  | $B_1$            | 85.677     | 2     | 2     | 0     | -   | 246.360 | $A_2$            | 315.347    |
|       |       |       |     | 5.881    | $A_2$            |            |       |       |       |     |         | 561.707          |            |
| 0     | 1     | 1     | +   | -79.811  | $B_2$            | 85.801     | 3     | 2     | 0     | -   | 294.449 | $A_2$            | 328.592    |
|       |       |       |     | 5.989    | $A_1$            |            |       |       |       |     |         | 623.041          |            |
| 1     | 1     | -1    | -   | 9.710    | $B_1$            | 115.551    | 0     | 3     | 1     | +   | 404.326 | $B_2$            |            |
|       |       |       |     | 125.262  | $A_2$            |            |       |       |       |     |         | 404.742          |            |
| 1     | 1     | 1     | +   | 9.697    | $B_2$            | 115.657    | 1     | 3     | 1     | +   | 511.251 | $B_2$            |            |
|       |       |       |     | 125.354  | $A_1$            |            |       |       |       |     |         | 511.706          |            |

Table S5: Lowest energy levels of  $\text{Cl}^- (\text{D}_2)$  for  $J = 1$  with their assigned vibrational quantum numbers  $v_1, v_2, l_2$  whenever possible, parity  $p$ , representation  $\Gamma_{rovib}$  of the group  $\text{G}_4$ . Energies are given in  $\text{cm}^{-1}$  with respect to the energy of separated monomers  $\text{Cl}^-$  and *ortho*- $\text{D}_2$ .  $\Delta E$  is the energy splitting due to tunneling.

| $v_1$ | $v_2$ | $l_2$ | $p$ | Energy   | $\Gamma_{rovib}$ | $\Delta E$ | $v_1$ | $v_2$ | $l_2$ | $p$ | Energy  | $\Gamma_{rovib}$ | $\Delta E$ |
|-------|-------|-------|-----|----------|------------------|------------|-------|-------|-------|-----|---------|------------------|------------|
| 0     | 0     | 0     | -   | -520.792 | $A_2$            | 0.395      | 2     | 1     | -1    | -   | -69.079 | $B_1$            | 28.570     |
|       |       |       |     | -520.398 | $B_1$            |            |       |       |       |     | -40.508 | $A_2$            |            |
| 1     | 0     | 0     | -   | -400.916 | $A_2$            | 1.025      | 2     | 1     | 1     | +   | -69.081 | $B_2$            | 28.591     |
|       |       |       |     | -399.892 | $B_1$            |            |       |       |       |     | -40.490 | $A_1$            |            |
| 2     | 0     | 0     | -   | -298.660 | $A_2$            | 2.210      | 3     | 1     | -1    | -   | -16.262 | $B_1$            | 41.969     |
|       |       |       |     | -296.450 | $B_1$            |            |       |       |       |     | 25.707  | $A_2$            |            |
| 3     | 0     | 0     | -   | -213.616 | $A_2$            | 4.248      | 3     | 1     | 1     | +   | -16.264 | $B_2$            | 41.998     |
|       |       |       |     | -209.368 | $B_1$            |            |       |       |       |     | 25.734  | $A_1$            |            |
| 4     | 0     | 0     | -   | -145.227 | $A_2$            | 7.469      | 4     | 1     | -1    | -   | 20.427  | $B_1$            | 56.631     |
|       |       |       |     | -137.758 | $B_1$            |            |       |       |       |     | 77.058  | $A_2$            |            |
| 5     | 0     | 0     | -   | -92.645  | $A_2$            | 12.138     | 4     | 1     | 1     | +   | 20.425  | $B_2$            | 56.676     |
|       |       |       |     | -80.507  | $B_1$            |            |       |       |       |     | 77.101  | $A_1$            |            |
| 6     | 0     | 0     | -   | -54.537  | $A_2$            | 18.309     | 5     | 1     | -1    | -   | 43.264  | $B_1$            | 71.788     |
|       |       |       |     | -36.228  | $B_1$            |            |       |       |       |     | 115.052 | $A_2$            |            |
| 7     | 0     | 0     | -   | -28.960  | $A_2$            | 25.708     | 5     | 1     | 1     | +   | 43.261  | $B_2$            | 71.866     |
|       |       |       |     | -3.252   | $B_1$            |            |       |       |       |     | 115.127 | $A_1$            |            |
| 8     | 0     | 0     | -   | -13.450  | $A_2$            | 33.722     | 6     | 1     | -1    | -   | 55.123  | $B_1$            | 86.388     |
|       |       |       |     | 20.273   | $B_1$            |            |       |       |       |     | 141.511 | $A_2$            |            |
| 9     | 0     | 0     | -   | -5.237   | $A_2$            | 41.466     | 6     | 1     | 1     | +   | 55.121  | $B_2$            | 86.590     |
|       |       |       |     | 36.229   | $B_1$            |            |       |       |       |     | 141.711 | $A_1$            |            |
| 10    | 0     | 0     | -   | -1.527   | $A_2$            | 47.994     | 0     | 2     | 0     | -   | -73.299 | $A_2$            | 76.716     |
|       |       |       |     | 46.467   | $B_1$            |            |       |       |       |     | 3.416   | $B_1$            |            |
| 11    | 0     | 0     | -   | -0.250   | $A_2$            | 52.987     | 1     | 2     | 0     | -   | -6.370  | $A_2$            | 97.587     |
|       |       |       |     | 52.737   | $B_1$            |            |       |       |       |     | 91.217  | $B_1$            |            |
| 12    | 0     | 0     | -   | 56.392   | $B_1$            |            | 2     | 2     | 0     | -   | 47.381  | $A_2$            | 116.232    |
|       |       |       |     | 58.337   | $B_1$            |            |       |       |       |     | 163.613 | $B_1$            |            |
| 0     | 1     | -1    | -   | -230.373 | $B_1$            | 8.350      | 3     | 2     | 0     | -   | 89.257  | $A_2$            | 132.331    |
|       |       |       |     | -222.023 | $A_2$            |            |       |       |       |     | 221.588 | $B_1$            |            |
| 0     | 1     | 1     | +   | -230.374 | $B_2$            | 8.359      | 4     | 2     | 0     | -   | 120.675 | $A_2$            | 145.704    |
|       |       |       |     | -222.015 | $A_1$            |            |       |       |       |     | 266.379 | $B_1$            |            |
| 1     | 1     | -1    | -   | -139.901 | $B_1$            | 17.131     | 0     | 3     | -1    | -   | 82.887  | $B_1$            | 176.337    |
|       |       |       |     | -122.771 | $A_2$            |            |       |       |       |     | 259.224 | $A_2$            |            |
| 1     | 1     | 1     | +   | -139.903 | $B_2$            | 17.145     | 0     | 3     | 1     | +   | 82.879  | $B_2$            | 178.788    |
|       |       |       |     | -122.758 | $A_1$            |            |       |       |       |     | 261.667 | $A_1$            |            |

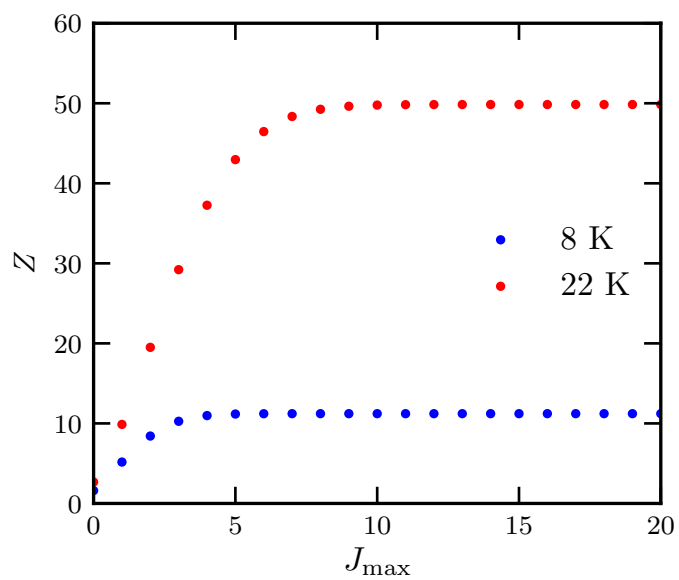

Figure S2: Partition functions for  $^{35}\text{Cl}^-(\text{H}_2)$  at 8 or 22 K, including both *ortho* and *para* species in a 3:1 ratio, versus the maximal value of the total angular momentum.

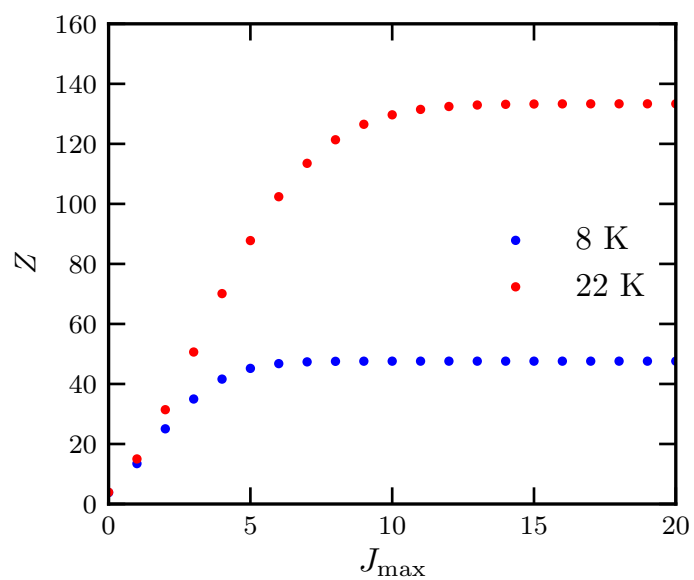

Figure S3: Partition functions for  $^{35}\text{Cl}^-(\text{D}_2)$  at 8 or 22 K, including both *ortho* and *para* species in a 2:1 ratio, versus the maximal value of the total angular momentum.

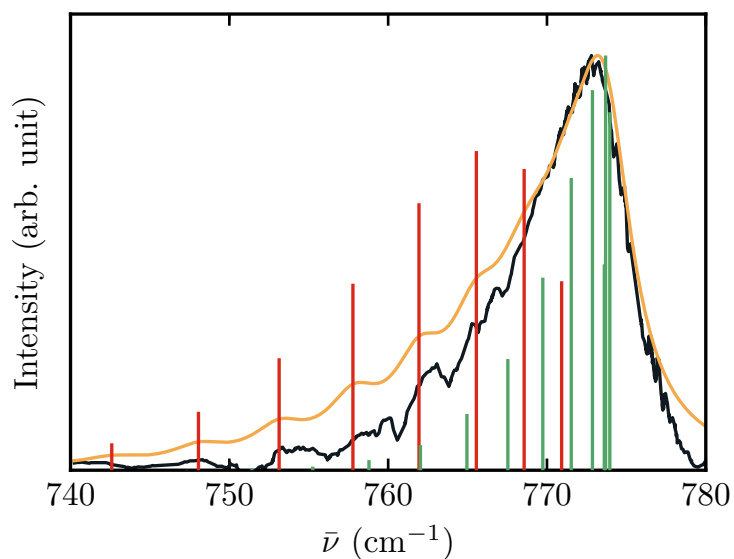

Figure S4: Comparison between the experimental (black) and the convolved theoretical predissociation spectra (orange) of Cl<sup>-</sup>(H<sub>2</sub>) at 22 K, assuming a linewidth broadening of about 1 cm<sup>-1</sup>. The theoretical stick spectrum is also shown, in red for the P band and green for the R band. The theoretical spectra are shifted to the blue by 8 cm<sup>-1</sup>. All spectra are normalized to unity at the maximum.

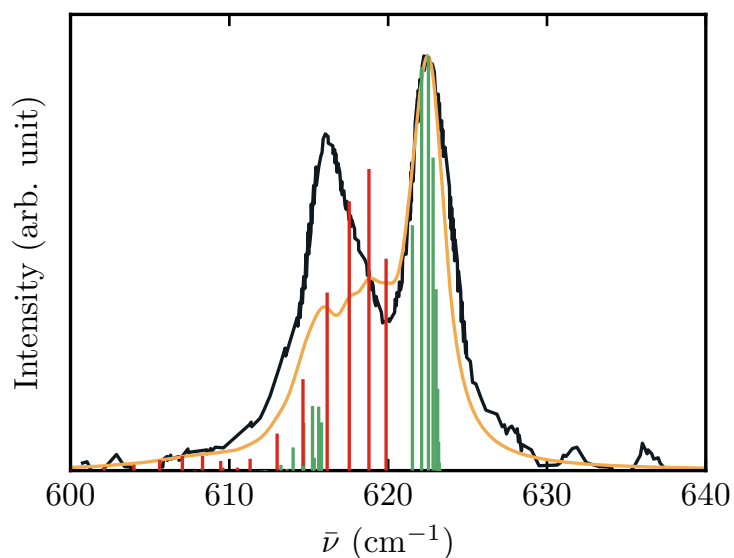

Figure S5: Comparison between the experimental (black) and the convolved theoretical predissociation spectra (orange) of Cl<sup>-</sup>(D<sub>2</sub>) at 8 K, assuming a linewidth broadening of about 1 cm<sup>-1</sup>. The theoretical stick spectrum is also shown, in red for the P band and green for the R band. The theoretical spectra are shifted to the blue by 8 cm<sup>-1</sup>. All spectra are normalized to unity at the maximum.



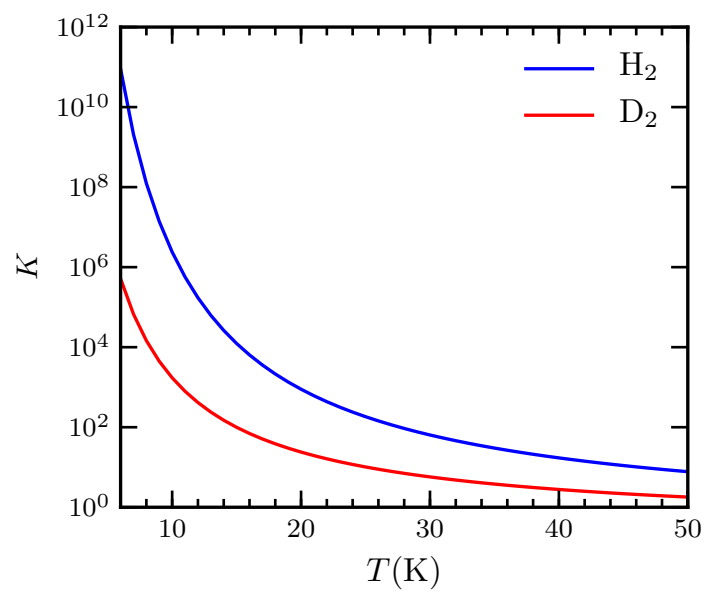

Figure S6: Calculated equilibrium constant for the ligand exchange reactions.
